# Supplementary material for: FBXO38 Ubiquitin Ligase Controls Centromere Integrity via ZXDA/B Stability
Source: Front Cell Dev Biol. 2022 Jun 23;10:929288. doi: 10.3389/fcell.2022.929288 (PMC9260856; doi:10.3389/fcell.2022.929288)
Supplement: Supplementary file 2 [file DataSheet1.xlsx]

## Sheet: Table S1
Sheet name:				Description:	URL of online software used
MACS2-called annotated peaks				Top MACS2-called peaks; genome annotation	https://usegalaxy.org/
Genome annotation				Genome annotation of MACS2-called peaks using PAVIS online software; Pie-chart visualization	https://manticore.niehs.nih.gov/pavis2/annotate

## Sheet: MACS2-called annotated peaks
Gene symbol	Entrez ID	Name	Alias	HGNC	Chromosome	Start	End	Sequence	-log10qvalue	genomic annotation	distance to TSS
SETD5	55209	SET domain containing 5	MRD23, SETD5A	25566	chr3	9397574	9397615	GGCGCCGGCGCTGGGAATCCC	752.651	Upstream	-21
RBM39	9584	RNA binding motif protein 39	CAPER, CAPERalpha, FSAP59, HCC1, RNPC2	15923	chr20	35742260	35742301	AAACACACGGGGCCTCACAGA	611.147	Upstream	-682
DAZAP1	26528	DAZ associated protein 1		2683	chr19	1407510	1407551	CCGGAGACCCCGTGCGGGAGC	600.734	Upstream	-39
CDC42	998	cell division cycle 42	CDC42Hs, G25K, TKS	1736	chr1	22052683	22052724	CCGAGGAGACCCCGCGCAGTG	598.154	5'UTR	14
PPP4R3A	55671	protein phosphatase 4 regulatory subunit 3A	FLFL1, KIAA2010, MSTP033, PP4R3, PP4R3A	20219	chr14	91510310	91510351	CCAGGGAGCAGCTGCAGGGGC	595.584	5'UTR	148
GNB1	2782	G protein subunit beta 1	HG2A, MDS, MRD42	4396	chr1	1891063	1891104	CGCGGCGGGCCCCTGCCCGCA	582.781	Upstream	-117
EIF4A2	1974	eukaryotic translation initiation factor 4A2	BM-010, DDX2B, EIF4A, EIF4F, eIF-4A-II	3284	chr3	186783272	186783313	CGTAGGAGCAGGGCGGGCGGG	572.94	Exon/CD	887
YWHAZ	7534	tyrosine 3-monooxygenase/tryptophan 5-monooxygenase activation protein zeta	14-3-3-zeta, HEL-S-3, HEL-S-93, HEL4, KCIP-1	12855	chr8	100952053	100952094	GGGGTTTCCTCCAATCACCAG	559.622	5'UTR	910
C9ORF16	79095	bublin coiled coil protein	C9orf16, EST00098	17823	chr19	47609073	47609114	CGGCCGGCCCCTTCTGGGTCC	557.049	Intron	3
PPP4R3B	57223	protein phosphatase 4 regulatory subunit 3B	FLFL2, PP4R3B, PSY2, SMEK2, smk1	29267	chr2	55617650	55617691	CTACGGCGGCCGACAAGTCCC	523.743	Exon/CD	1210
KMT2E	55904	lysine methyltransferase 2E (inactive)	HDCMC04P, MLL5, NKp44L, ODLURO, SETD5B	18541	chr7	105014107	105014148	CCTGCGGAGCGGGACGGGCGT	509.766	Intron	194
ARIH1	25820	ariadne RBR E3 ubiquitin protein ligase 1	ARI, HARI, HHARI, UBCH7BP	689	chr15	72474205	72474246	CCGTGGGGTCTCCCCGGGCTC	472.745	Exon/CD	943
PPP2R1A	5518	protein phosphatase 2 scaffold subunit Aalpha	MRD36, PP2A-Aalpha, PP2AA, PP2AAALPHA, PR65A	9302	chr19	52189972	52190013	TGTAAACTGGCTCGGGCGCCC	465.451	Upstream	-47
SCAMP4	113178	secretory carrier membrane protein 4	SCAMP-4	30385	chr19	1905718	1905759	GCGGGAGACCCCGTATCCTCC	457.917	Intron	334
ATP5F1E	514	ATP synthase F1 subunit epsilon	ATP5E, ATPE, MC5DN3	838	chr20	59032401	59032442	CACGGCCCCTGCTGCCCTGCC	437.902	Upstream	-76
YWHAB	7529	tyrosine 3-monooxygenase/tryptophan 5-monooxygenase activation protein beta	GW128, HEL-S-1, HS1, KCIP-1, YWHAA	12849	chr20	44885647	44885688	TTGGGGCGGGGCGCGGCCAGG	408.113	Upstream	-9
HNRNPR	10236	heterogeneous nuclear ribonucleoprotein R	HNRPR, hnRNP-R	5047	chr1	23344318	23344359	CCGGCAGCACGCGGGGTTTCC	402.517	Upstream	-21
GORASP2	26003	golgi reassembly stacking protein 2	GOLPH6, GRASP55, GRS2, p59	17500	chr2	170973627	170973668	CGGCCGCGGGGTCTCCGGGCC	365.326	Upstream	6600
RPS19	6223	ribosomal protein S19	DBA, DBA1, LOH19CR1, S19, eS19	10402	chr19	41860238	41860279	GTCGTTCCCTTTCCCCTGGCT	331.968	5'UTR	1
G3BP2	9908	G3BP stress granule assembly factor 2		30291	chr4	75673426	75673467	TCTTATTGTTTTACCCCTGCC	330.202	Intron	51079
ZBTB4	57659	zinc finger and BTB domain containing 4	KAISO-L1, ZNF903	23847	chr17	7484261	7484302	GCGCAGGCGGCCCCGTAGCGC	318.255	Upstream	-85
ZNF318	24149	zinc finger protein 318	HRIHFB2436, TZF, ZFP318	13578	chr6	43369579	43369620	CCCCCCCGCCTCCGGGGTTCC	280.169	5'UTR	28
RPS27A	6233	ribosomal protein S27a	CEP80, HEL112, S27A, UBA80, UBC	10417	chr2	55232631	55232672	TCGGCGGGAGCTCCGGGAAAC	259.527	Intron	219
BICRA	29998	BRD4 interacting chromatin remodeling complex associated protein	CSS12, GLTSCR1, SMARCK1	4332	chr6	42782045	42782086	CGATGGCGCAGAAACCCCGTT	251.98	5'UTR	38
RBBP6	5930	RB binding protein 6, ubiquitin ligase	MY038, P2P-R, PACT, RBQ-1, SNAMA	9889	chr16	24539558	24539599	GTGGGGCGCTCGTCCGAAGCC	227.445	5'UTR	22
MTA2	9219	metastasis associated 1 family member 2	MTA1L1, PID	7411	chr11	62599395	62599436	AGGCCAAGGTCAGCCCCTGCC	200.48	Intron	2072
YWHAQ	10971	tyrosine 3-monooxygenase/tryptophan 5-monooxygenase activation protein theta	14-3-3, 1C5, HS1	12854	chr2	9631186	9631227	TTGGCCGGCAGGCTGCGGCTT	191.611	Upstream	-938
RPS16	6217	ribosomal protein S16	S16	10396	chr19	39435921	39435962	CGCCGCAACCGGAAAAGGAAA	182.811	Upstream	-215
PEX2	5828	peroxisomal biogenesis factor 2	PAF1, PBD5A, PBD5B, PMP3, PMP35	9717	chr8	77000666	77000707	TAGCTGGCCCGTCAGTCATCC	176.254	Intron	358
CCDC85C	317762	coiled-coil domain containing 85C		35459	chr14	99604429	99604470	CTCCGGGGGTGTGCGGGAGGG	174.081	Upstream	-107
RPL23A	6147	ribosomal protein L23a	L23A, MDA20	10317	chr17	28720004	28720045	AAAGCGAAGAAGGAAGGTGTG	154.726	Exon/CD	33
RPS11	6205	ribosomal protein S11	S11	10384	chr19	49496373	49496414	CTCCAGCCCCTGCGTAATCGA	142.019	5'UTR	19
G3BP1	10146	G3BP stress granule assembly factor 1	G3BP, HDH-VIII	30292	chr5	151771435	151771476	TTCCGAGCAGAGCAACCTCCG	133.634	5'UTR	53
P4HA1	5033	prolyl 4-hydroxylase subunit alpha 1	P4HA	8546	chr10	73097140	73097181	CGGGGTTTCCCCCGCTCCTGT	116.287	Downstream	4137
TLK2	11011	tousled like kinase 2	HsHPK, MRD57, PKU-ALPHA	11842	chr17	62478577	62478618	GGCGCGGCTTCCTCCGCCGGC	103.077	Intron	531
SPECC1L	23384	sperm antigen with calponin homology and coiled-coil domains 1 like	CYTSA, GBBB2, OBLFC1, TBHS, TBHS1	29022	chr22	24271019	24271060	TTATCGCCTCAGCGCCGCCCG	97.1554	Intron	141
RPL13A	23521	ribosomal protein L13a	L13A, TSTA1	10304	chr19	49487557	49487598	GTCGGGACGGTGCGGGTCAGG	96.2745	5'UTR	23
SAMD10	140700	sterile alpha motif domain containing 10	C20orf136, dJ591C20, dJ591C20.7	16129	chr20	63974029	63974070	CAGGGCGTGACGCCACTGCCC	73.9959	Intron	74709
ALG13	79868	ALG13 UDP-N-acetylglucosaminyltransferase subunit	CDG1S, CXorf45, DEE36, EIEE36, GLT28D1	30881	chrX	111681197	111681238	GAACCCGCGCCATGAAGTGCG	73.9959	5'UTR	1
ENOSF1	55556	enolase superfamily member 1	FUCD, RTS, TYMSAS	30365	chr18	712591	712632	GTGGCCGCGGCCCCCGTGCGG	62.7992	Exon/CD	19
EPHA10	284656	EPH receptor A10		19987	chr1	37752840	37752881	GGGTGGGGGGCGCGGACGGCC	60.963	Intron	46
PIK3R2	5296	phosphoinositide-3-kinase regulatory subunit 2	MPPH, MPPH1, P85B, p85, p85-BETA	8980	chr19	18157847	18157888	TCCCCGCCGAGGGCCAGAGCA	53.7152	Intron	1987
RAB14	51552	RAB14, member RAS oncogene family	FBP, RAB-14	16524	chr9	121201794	121201835	AGTAGCAGTGGCAGCGGTGAC	48.5056	5'UTR	55
G3BP1	10146	G3BP stress granule assembly factor 1	G3BP, HDH-VIII	30292	chr5	57173667	57173708	TCACGTCAGCAGCAGGGGGTA	48.3865	Upstream	-261
NEO1	4756	neogenin 1	IGDCC2, NGN, NTN1R2	7754	chr15	73052112	73052153	GCCCGGCGCGCGCGCCCCGCA	48.3865	Intron	422
SCAP	22937	SREBF chaperone		30634	chr3	47475883	47475924	AGTCCGGTGCGTGGCGCCCTC	43.8242	5'UTR	17
FAM229A	100128071	family with sequence similarity 229 member A		44652	chr1	32351620	32351661	TAGCAGCTGGGCCAGCGCGCC	39.7305	Intron	119
CEBPD	1052	CCAAT enhancer binding protein delta	C/EBP-delta, CELF, CRP3, NF-IL6-beta	1835	chr8	47737771	47737812	AGGGCCCGGGCCCAAGGGGCG	38.037	Exon/CD	1295
BICRAL	23506	BICRA like chromatin remodeling complex associated protein	GLTSCR1L, KIAA0240, SMARCK2	21111	chr9	128160002	128160043	ACCTCCCTACTCCTGGGCTTT	28.1704	Upstream	-238
CPSF1	29894	cleavage and polyadenylation specific factor 1	CPSF160, HSU37012, MYP27, P/cl.18	2324	chr8	144409380	144409421	AGCGCCGCCGCGTGAGCGTGG	28.1704	Upstream	-92
ZNF664	144348	zinc finger protein 664	ZFOC1, ZNF176	25406	chr12	123973117	123973158	CGGGCGGTGGGGGCGCGGGCC	26.5785	5'UTR	14
MRPS23	51649	mitochondrial ribosomal protein S23	CGI-138, COXPD46, HSPC329, MRP-S23	14509	chr17	57850111	57850152	GCAGCCCCTGCGGGAGAGCGG	25.0032	Upstream	-134
ACSF3	197322	acyl-CoA synthetase family member 3		27288	chr16	89093829	89093870	GCCGGGGAAGCTGTTGGGCGC	25.0032	5'UTR	40
ACSF3	197322	acyl-CoA synthetase family member 3		27288	chr16	89720923	89720964	GCGCTGGTGCTGGAGCCGCCC	25.0032	Intron	543
SLC39A3	29985	solute carrier family 39 member 3	ZIP-3, ZIP3	17128	chr19	2740178	2740219	CTGAGCGGCGGGCGCAGCCAC	23.4464	Upstream	-181
SAV	60485	salvador family WW domain containing protein 1	SAV, WW45, WWP4	17795	chr14	50668186	50668227	GTCGGCCCGCTCTGCGACGCT	23.4464	5'UTR	91
CS	1431	citrate synthase		2422	chr12	56300110	56300151	CCACCCTGGGACGGCGTGCTC	23.4464	Intron	178
SIN3A	25942	SIN3 transcription regulator family member A	WITKOS	19353	chr15	75451063	75451104	GCCCACCCCAGGAGGAGGGGA	23.4464	Intron	621
SPG7	6687	SPG7 matrix AAA peptidase subunit, paraplegin	CAR, CMAR, PGN, SPG5C	11237	chr16	89490550	89490591	TGGCTCCAGGACCCAGCGGCG	23.4464	Upstream	-347
CCDC88C	440193	coiled-coil domain containing 88C	DAPLE, HKRP2, HYC1, KIAA1509, SCA40	19967	chr14	91417821	91417862	GCCCACGTTCCGCGGCTTCGG	23.4464	5'UTR	3
DDX55	57696	DEAD-box helicase 55		20085	chr12	123602026	123602067	GCTCCAGCGAAGTTCCCGGCC	21.9084	Upstream	-31
LSM6	11157	LSM6 homolog, U6 small nuclear RNA and mRNA degradation associated	YDR378C	17017	chr4	146175786	146175827	GTTCCCGCCGGCGAGGTGAGC	21.9084	Exon/CD	36
SLC39A13	91252	solute carrier family 39 member 13	EDSSPD3, LZT-Hs9, SCDEDS, ZIP13	20859	chr11	47408504	47408545	GGCCCCTTGTGACGTGGCCGC	20.3891	Intron	1392
ATXN2	6311	ataxin 2	ATX2, SCA2, TNRC13	10555	chr12	111599447	111599488	GCGGCGAGACTCGGTGGCCAC	20.3891	Upstream	-31
MSTO1	55154	misato mitochondrial distribution and morphology regulator 1	LST005, MMYAT, MST	29678	chr1	155610194	155610235	GAGCGGCGCGGCTGAGGCGCG	20.3891	Intron	166
TTC13	79573	tetratricopeptide repeat domain 13		26204	chr1	230978767	230978808	GCCACAGCGCCGCCCCAGAAG	20.3891	Exon/CD	51
SHARPIN	81858	SHANK associated RH domain interactor	SIPL1	25321	chr8	144103767	144103808	CTCCGAGCGCGCTTCCGTGGG	20.0219	Intron	482
AURKAIP1	54998	aurora kinase A interacting protein 1	AIP, AKIP, MRP-S38	24114	chr1	1375245	1375286	CACAGCGCCCGCTGGCGTCCT	18.8929	Upstream	-106
TSG101	7251	tumor susceptibility 101	TSG10, VPS23	15971	chr11	18526592	18526633	CCCGCACCAGGCGACAGGCGC	18.8929	Intron	269
SPOPL	339745	speckle type BTB/POZ protein like	BTBD33	27934	chr2	138501937	138501978	GGCGGGTCGGGGAGGAGGGAT	18.8929	5'UTR	25
HPS3	84343	HPS3 biogenesis of lysosomal organelles complex 2 subunit 1	BLOC2S1, SUTAL	15597	chr3	149129592	149129633	GCGTTCACGTGACCCGGCGTC	18.8929	5'UTR	28
TTC21B	79809	tetratricopeptide repeat domain 21B	ATD4, FAP60, FLA17, IFT139, IFT139B	25660	chr2	165953890	165953931	CAGGGGCGGCGGGGACCCGGA	18.8929	Upstream	-99
SFT2D1	113402	SFT2 domain containing 1	C6orf83, pRGR1	21102	chr6	166342512	166342553	GCCCCTGACGCCCACCAGGAA	18.0535	5'UTR	59

## Sheet: Genome annotation
Location	Number	Proportion
Upstream (<1000 bp)	25	0.342
5' UTR	18	0.247
Exons/CDS	8	0.11
Introns	21	0.288
3' UTR	0	0
Downstream	1	0.014
